# Supplementary material
Source: Springer Nature journal article supplement (https://www.springermedizin.de/resource/supplementary/12885_2012_4027_MOESM16_ESM.pdf/9465002)

**A****Live Tissue**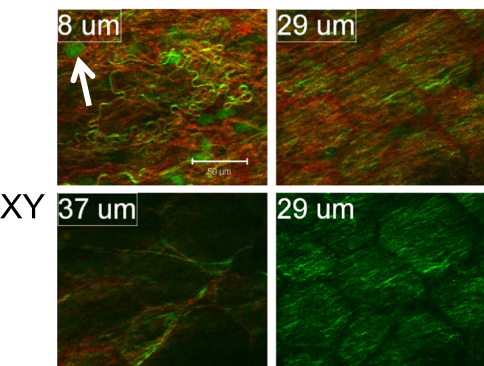**B****XZ**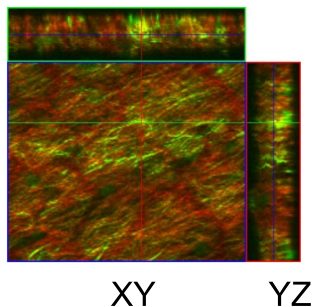**C****3D**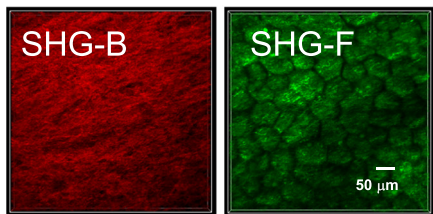**D****XY**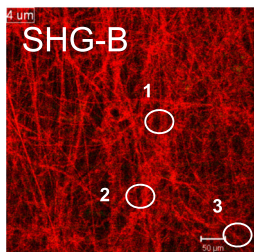**E****SHG-B (Live)**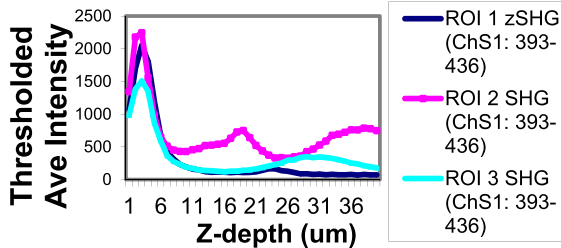

Supplement: MOESM16 [file 9465002]
